# Supplementary material for: A Single Mutation is Sufficient to Modify the Metal Selectivity and Specificity of a Eukaryotic Manganese Superoxide Dismutase to Encompass Iron
Source: PubMed Central journal article supplement — Chemistry. 2017 Dec 12;24(20):5303–8. doi: 10.1002/chem.201704655 (PMC5969255; doi:10.1002/chem.201704655), 2017-12-12
Supplement: CHEM-24-5303-s001.pdf [file CHEM-24-5303-s001.pdf]

# CHEMISTRY

## A **European** Journal

### Supporting Information

#### **A Single Mutation is Sufficient to Modify the Metal Selectivity and Specificity of a Eukaryotic Manganese Superoxide Dismutase to Encompass Iron**

Thérèse Hunter,<sup>[a]</sup> Rosalin Bonetta,<sup>[a]</sup> Anthony Sacco,<sup>[b]</sup> Marita Vella,<sup>[a]</sup> Paul-Michael Sultana,<sup>[a]</sup> Chi H. Trinh,<sup>[c]</sup> Hava B. R. Fadia,<sup>[c]</sup> Tomasz Borowski,<sup>[d]</sup> Rebeca Garcia-Fandiño,<sup>[e]</sup> Thomas Stockner,<sup>[f]</sup> and Gary J. Hunter<sup>\*[a]</sup>

chem\_201704655\_sm\_Q142H.mp4
